# Supplementary material
Source: PubMed Central journal article supplement (PMC7111484)
Supplement: mmc3.pdf [file mmc3.pdf]

| Assay no.                              | 10 <sup>8</sup> | 10 <sup>7</sup> | 10 <sup>6</sup> | 10 <sup>5</sup> | 10 <sup>4</sup> | 10 <sup>3</sup> | 10 <sup>2</sup> | 10 <sup>1</sup> |
|----------------------------------------|-----------------|-----------------|-----------------|-----------------|-----------------|-----------------|-----------------|-----------------|
| <u>Intra-assay variation</u>           |                 |                 |                 |                 |                 |                 |                 |                 |
| I                                      | 12.54           | 15.62           | 19.05           | 22.12           | 25.12           | 29.13           | 33.63           | 36.32           |
| II                                     | 12.59           | 15.75           | 19.15           | 22.01           | 25.22           | 29.49           | 32.74           | 36.39           |
| III                                    | 12.60           | 15.92           | 19.39           | 22.08           | 25.18           | 29.32           | 33.18           | 35.69           |
| IV                                     | 12.56           | 15.70           | 19.73           | 22.24           | 25.33           | 30.03           | 33.38           | 35.80           |
| Mean C <sub>T</sub> ± S.D <sup>a</sup> | 12.57 ±0.03     | 15.74 ±0.13     | 19.33 ±0.30     | 22.11 ±0.10     | 25.21 ±0.09     | 29.49 ±0.39     | 33.23 ±0.38     | 36.05 ±0.36     |
| CV (%) <sup>b</sup>                    | 0.22            | 0.81            | 1.56            | 0.44            | 0.35            | 1.31            | 1.13            | 0.99            |
| <u>Inter-assay variation</u>           |                 |                 |                 |                 |                 |                 |                 |                 |
| I                                      | 12.40           | 15.63           | 19.08           | 22.47           | 26.10           | 29.61           | 33.13           | 35.83           |
| II                                     | 12.50           | 15.58           | 19.18           | 22.41           | 26.05           | 29.55           | 33.12           | 36.76           |
| III                                    | 12.25           | 15.84           | 19.28           | 22.24           | 26.17           | 29.49           | 32.82           | 36.07           |
| IV                                     | 12.53           | 15.36           | 19.77           | 23.22           | 26.66           | 30.31           | 33.57           | 36.19           |
| Mean C <sub>T</sub> ± S.D <sup>a</sup> | 12.42 ±0.13     | 15.60 ±0.20     | 19.32 ±0.31     | 22.58 ±0.43     | 26.24 ±0.28     | 29.74 ±0.38     | 33.16 ±0.31     | 36.21 ±0.39     |
| CV (%) <sup>b</sup>                    | 1.02            | 1.26            | 1.58            | 1.92            | 1.07            | 1.29            | 0.93            | 1.09            |

**SUPPLEMENTAL TABLE 1. Reproducibility of C<sub>T</sub> values in intra- and inter-assays using the CDV N 2-step RT-qPCR assay**

<sup>a</sup> Standard deviation  
<sup>b</sup> Coefficient of variation

| Assay no.                              | 10 <sup>8</sup> | 10 <sup>7</sup> | 10 <sup>6</sup> | 10 <sup>5</sup> | 10 <sup>4</sup> | 10 <sup>3</sup> | 10 <sup>2</sup> | 10 <sup>1</sup> |
|----------------------------------------|-----------------|-----------------|-----------------|-----------------|-----------------|-----------------|-----------------|-----------------|
| <u>Intra-assay variation</u>           |                 |                 |                 |                 |                 |                 |                 |                 |
| I                                      | 12.21           | 15.93           | 19.89           | 23.24           | 26.53           | 30.05           | 33.54           | 36.16           |
| II                                     | 12.60           | 15.92           | 20.21           | 23.45           | 26.33           | 29.55           | 33.40           | 36.07           |
| III                                    | 12.33           | 15.41           | 19.79           | 23.33           | 26.80           | 30.29           | 33.57           | 37.73           |
| IV                                     | 12.34           | 15.00           | 20.16           | 23.73           | 26.91           | 29.91           | 33.10           | 36.80           |
| Mean C <sub>T</sub> ± S.D <sup>a</sup> | 12.37 ±0.16     | 15.56 ±0.45     | 20.01 ±0.20     | 23.43 ±0.21     | 26.64 ±0.26     | 29.95 ±0.31     | 33.40 ±0.21     | 36.69 ±0.77     |
| CV (%) <sup>b</sup>                    | 1.33            | 2.88            | 1.02            | 0.91            | 0.99            | 1.03            | 0.64            | 2.09            |
| <u>Inter-assay variation</u>           |                 |                 |                 |                 |                 |                 |                 |                 |
| I                                      | 12.34           | 15.7            | 19.7            | 23.09           | 26.37           | 30.43           | 33.63           | 36.32           |
| II                                     | 12.55           | 16.05           | 19.73           | 22.92           | 26.32           | 30.26           | 32.74           | 36.39           |
| III                                    | 12.34           | 15.29           | 19.95           | 22.89           | 26.96           | 30.21           | 33.18           | 36.69           |
| IV                                     | 12.55           | 15.98           | 19.86           | 22.86           | 26.38           | 29.63           | 33.38           | 36.8            |
| Mean C <sub>T</sub> ± S.D.             | 12.45 ±0.12     | 15.76 ±0.34     | 19.81 ±0.12     | 22.94 ±0.10     | 26.51 ±0.30     | 30.13 ±0.35     | 33.23 ±0.38     | 36.55 ±0.23     |
| CV (%)                                 | 0.97            | 2.19            | 0.59            | 0.45            | 1.14            | 1.15            | 1.13            | 0.63            |

**SUPPLEMENTAL TABLE 2. Reproducibility of C<sub>T</sub> values in intra- and inter-assays using the SIV gag 2-step RT-qPCR assay**

<sup>a</sup> Standard deviation  
<sup>b</sup> Coefficient of variation
